# Supplementary material for: Highly dispersed Ru clusters toward an efficient and durable hydrogen oxidation reaction
Source: Royal Society of Chemistry journal article supplement (doi:10.1039/d2cc04591e), 2022-01-01
Supplement: d2cc04591e1.pdf [file d2cc04591e1.pdf]

## **Electronic Supplementary Information**

*Highly dispersed Ru clusters toward efficient and durable hydrogen oxidation reaction*

*Ge Meng et al.*

## Experimental Section

### Preparation of NHCS, Ru<sub>p</sub>/NHCS and Ru<sub>c</sub>/NHCS

According to the literature,<sup>30</sup> Zn(NO<sub>3</sub>)<sub>2</sub>·6H<sub>2</sub>O (225 mg) with ferroceneboronic acid (46 mg), and 2-methylimidazole (2.75 g) were dissolved in deionized water (7.5 mL), respectively. The two solutions were mixed quickly. The ZIF-8 polyhedrons was obtained by stirring for 6 h at room temperature (RT). Then, 200 mg ZIF-8 powder was mixed with 100 mg dopamine hydrochloride in a 50 mL Tris aqueous solution under magnetic stirring for 24 h to yield ZIF-8@PDA. Subsequently, 100 mg ZIF-8@PDA was added into Ru(acac)<sub>3</sub> solution (0.1 mmol) and stirring for 2 h at RT. Finally, the obtained ZIF-8@PDA@Ru(acac)<sub>3</sub> precipitates were heated to 800 °C for 2 h to generate Ru<sub>c</sub>/NHCS. Similarly, the control samples (Ru<sub>p</sub>/NHCS and NHCS) were prepared via an identical synthesis route but with 0.3 mmol Ru(acac)<sub>3</sub> and without Ru(acac)<sub>3</sub> addition, respectively.

### Characterizations

The morphology of the prepared samples were characterized by SEM (Quanta FEG 250) and TEM (Talos F200X), respectively. The crystalline structures were analyzed by Rigaku D/max 2500 X-ray diffractometer (XRD) with Cu K $\alpha$  radiation ( $\lambda = 0.154598$  nm). X-ray photoelectron spectroscopy (XPS, ESCALAB 250Xi, Thermo Scientific) was acquired with a monochromatic Al K $\alpha$  radiation source.

### HOR measurements

All electrochemical tests were carried out on an electrochemical workstation (CHI 760E) with a standard three-electrode system with the 0.1 M KOH solution as the electrolyte at 25°C. A graphite rod and Hg/HgO electrode were applied as the counter electrode and reference electrode, respectively. The glassy carbon electrode loading catalyst inks were performed as

the working electrode. To prepare the catalyst ink, 5 mg of the sample was dispersed in a solution containing 500  $\mu\text{L}$  0.5 wt.% Nafion and 500  $\mu\text{L}$  ethanol, and then the ink was dispersed by ultrasound for at least 30 min. After that, the ink was dropped at the glassy carbon electrode ( $0.196\text{ cm}^2$  for the active geometric area) and dried in room temperature. The catalyst loading of  $\text{Ru}_c/\text{NHCS}$  on the glassy carbon electrode was  $0.2\text{ mg cm}^{-2}$ . As a comparison, the NCHS,  $\text{Ru}_p/\text{NHCS}$  and Pt/C electrodes were also measured.  $iR$  compensation was applied to all initial data except stability data. All the potential values were calculated according to the equation,  $E_{\text{RHE}} = E_{\text{Hg}/\text{HgO}} + E_{\text{Hg}/\text{HgO}}^0 + 0.059\text{ pH}$ . Copper underpotential deposition (Cu-UPD) stripping measurement was conducted in an Ar-purged 0.5 M  $\text{H}_2\text{SO}_4$  solution containing 5 mM of  $\text{CuSO}_4$  after Cu deposition at 0.276 V for 100 s.

### ***AEMFC test***

Based on the literature,<sup>2,20</sup> catalyst ink was prepared by mixing catalyst with 5 wt% Nafion ionomers diluted by isopropanol/water (1 : 1) solvent. The catalyst ink was ultrasonic treated for 1 hour and sprayed on two side of Gore ionomer membrane (20  $\mu\text{m}$ ) with an effective area of  $4\text{ cm}^2$  using airbrush (S130). The  $\text{Ru}_p/\text{NHCS}$ ,  $\text{Ru}_c/\text{NHCS}$ , and 20 wt% Pt/C (JM) were used as anode with a metal loading of  $24\text{ }\mu\text{g}_{\text{metal}}\text{ cm}^{-2}$ , while the commercial Pt/C was used as cathode with a loading of  $100\text{ }\mu\text{g}_{\text{Pt}}\text{ cm}^{-2}$ . Then we tested them using Scribner 850e as condition-controlled fuel cell test station at  $80\text{ }^\circ\text{C}$  and 100% relative humidity. The back pressures and gas flow rates were set to 2 atm and  $300\text{ mL min}^{-1}$ , respectively.

### ***DFT calculations***

To investigate the HOR performance of Ru clusters and comparative samples, all theoretical studies were performed using the Dmol<sup>3</sup> program in Materials Studio. Here, for Comparison of Ru metal and Pt/C, using representative crystal planes Ru (001) and Pt (111) in the calculations were to study their HOR performances. During the calculation process, based on

density functional theory (DFT), the Perdew-Burke-Ernzerhof (PBE) functional with the generalized gradient approximation (GGA) was adopted. To avoid periodic action of each structure in the z direction, the vacuum layers of all structures accompanied with spin-polarized were larger than 15 Å. To calculate the Gibbs free energy change in the HOR path, each value of change ( $\Delta G$ ) was determined according to the computational hydrogen electrode (CHE) model by:

$$\Delta G = \Delta E_{ads} - T\Delta S + ZPVE + \int C_p dT$$

in the above physical symbols, where  $\Delta E_{ads}$  represents energy difference changed by adsorbate, and  $\Delta S$  and  $ZPVE$  are entropy difference and zero-point vibrational energy, respectively.  $T$  and  $C_p$  represent temperature around system and thermal capacity, respectively. While the vibrational enthalpy and entropy contributions of absorbed species are negligible according to previous theoretical studies.

## Figures and Table

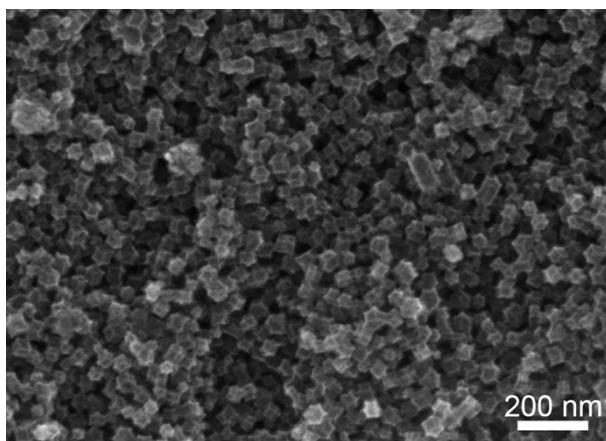

**Figure S1.** SEM image of the as-prepared ZIF-8 polyhedrons.

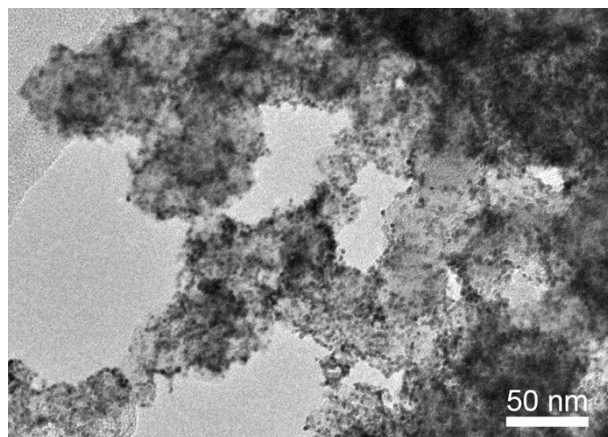

**Figure S2.** TEM image of the as-prepared  $\text{Ru}_p/\text{NCHS}$ . Clearly, Ru particles spread throughout the hollow carbon spheres.

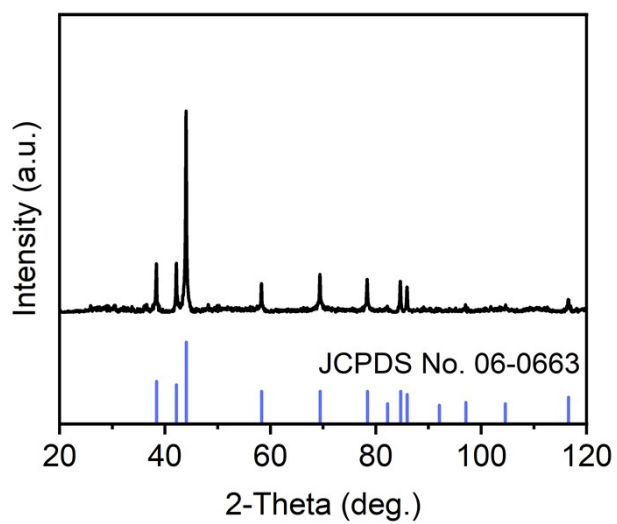

**Figure S3.** XRD pattern of the as-prepared Ru<sub>p</sub>/NCHS. All the diffraction peaks can be ascribed to hexagonal phase of Ru (JCPDS No. 06-0663).

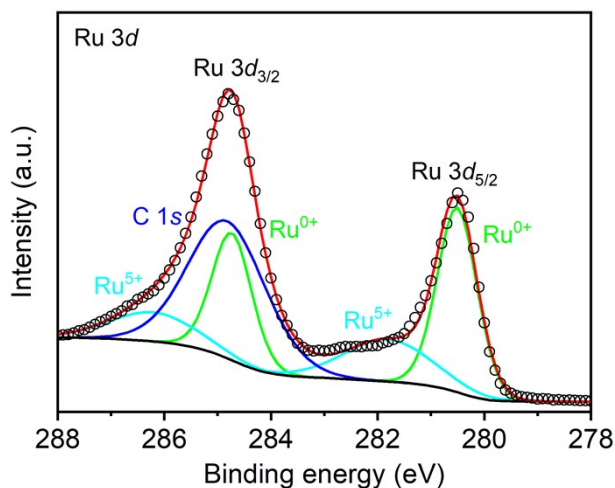

**Figure S4.** High-resolution Ru 3d XPS spectrum of the as-prepared Ru<sub>p</sub>/NCHS. The peaks in Ru<sub>p</sub>/NCHS can be deconvoluted into two Ru 3d<sub>5/2</sub> peaks at 280.5 and 281.2 eV, which correspond to Ru<sup>0</sup> and Ru<sup>5+</sup>, respectively (*Nano Energy* 2021, 88, 106211). Similarly, the two Ru 3d<sub>3/2</sub> peaks at 284.7 and 286.2 eV can be ascribed to Ru<sup>0</sup> and Ru<sup>4+</sup>, respectively. Of note, the XPS result confirms that metallic Ru<sup>0</sup> is dominant over the positive charged Ru species, which is consistent with XRD pattern (Figure S3).



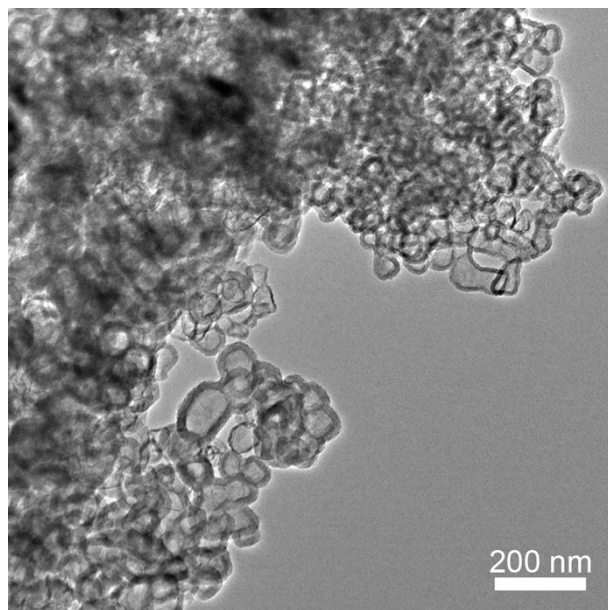

**Figure S5.** TEM image of the as-prepared NCHS.

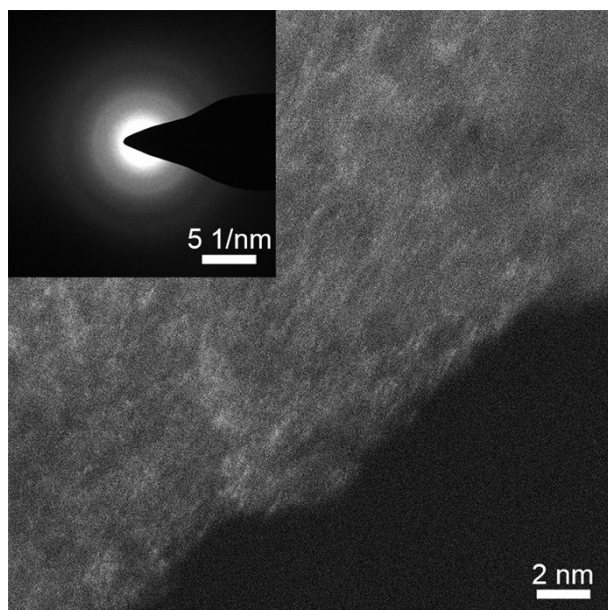

**Figure S6.** HRTEM image of the carbon shell of the as-prepared NCHS (inset shows the corresponding selected area electron diffraction (SAED) pattern). Here, the lattice fringe of carbon cannot be detected due to its amorphous nature, which is further confirm by SAED.

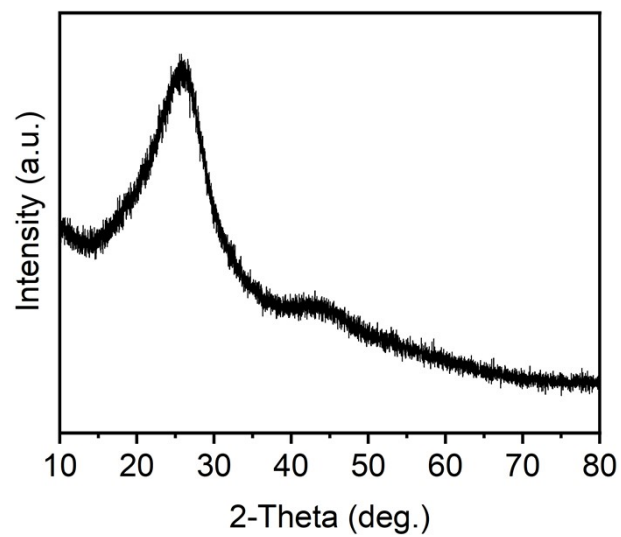

**Figure S7.** XRD pattern of the as-prepared Ru<sub>c</sub>/NCHS.

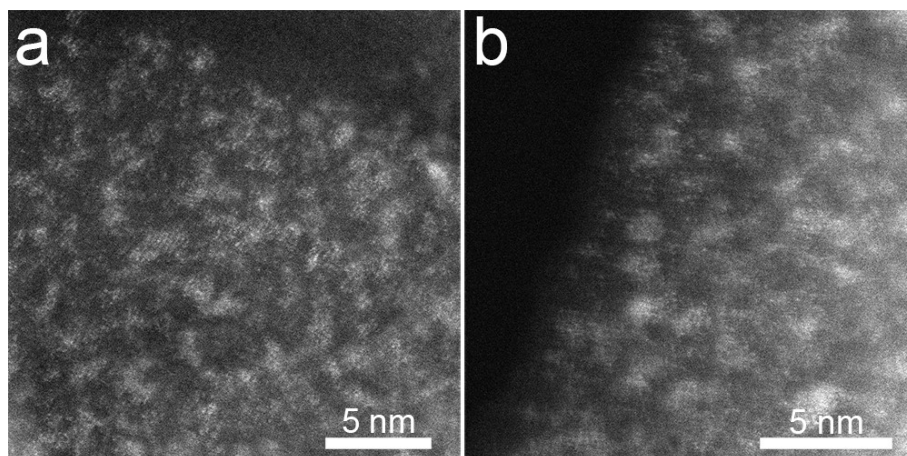

**Figure S8.** HAADF-STEM images of the as-prepared Ru<sub>c</sub>/NCHS.

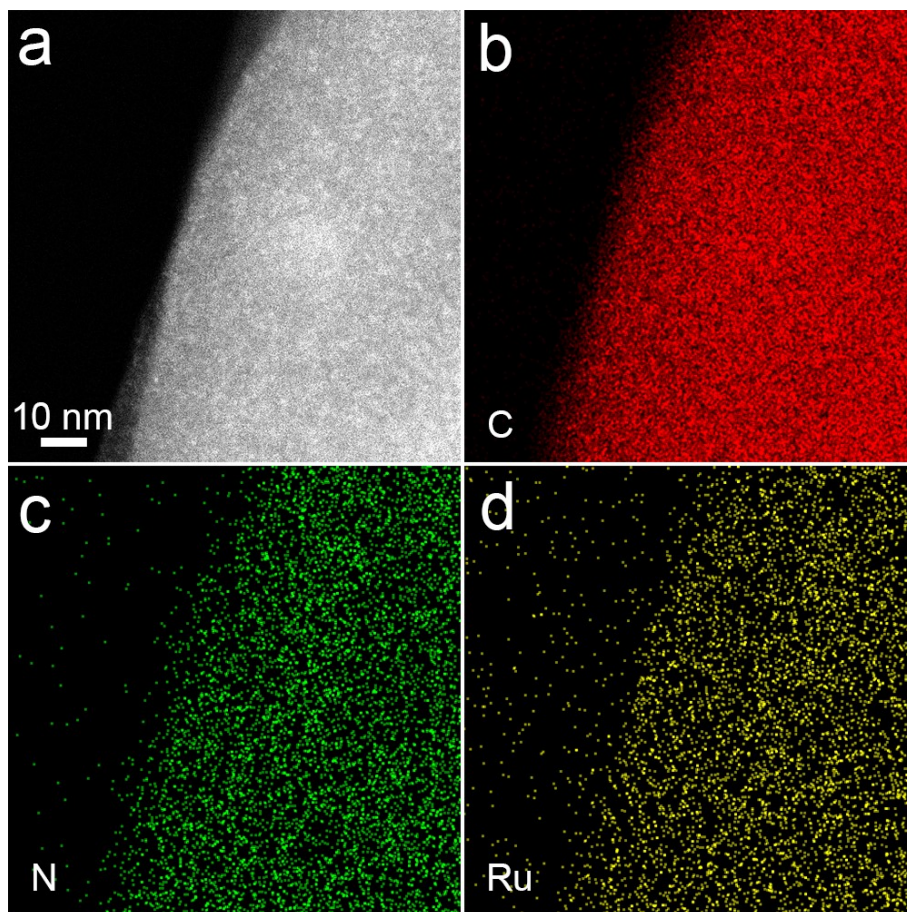

**Figure S9.** Elemental mappings of the as-prepared Ru<sub>c</sub>/NCHS.

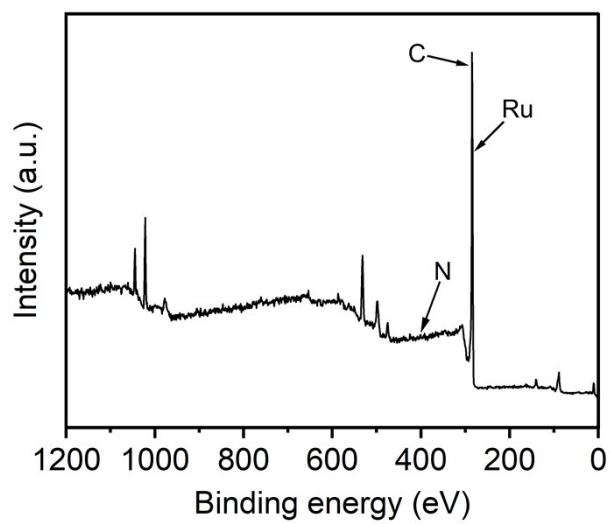

**Figure S10.** XPS survey spectrum of the as-prepared Ru<sub>c</sub>/NCHS.

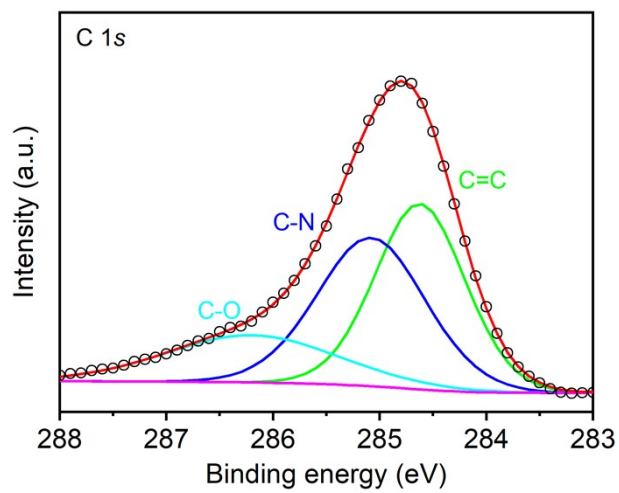

**Figure S11.** High-resolution C 1s XPS spectrum of the as-prepared Ru<sub>c</sub>/NCHS. The C 1s XPS spectrum demonstrates the existence of C=C (284.6 eV), C–O (286.2), and C=N (285.1 eV) bonds in Ru<sub>c</sub>/NCHS (*iScience* 2020, 23, 101793).

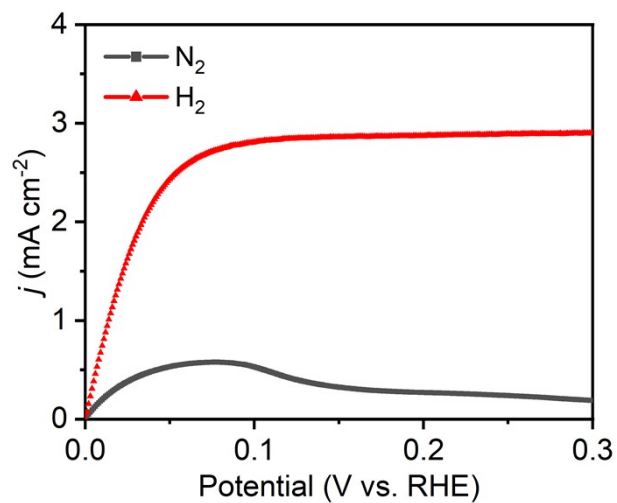

**Figure S12.** HOR polarization curves of the as-prepared  $\text{Ru}_0/\text{NCHS}$  recorded in Ar-/ $\text{H}_2$ -saturated electrolytes.



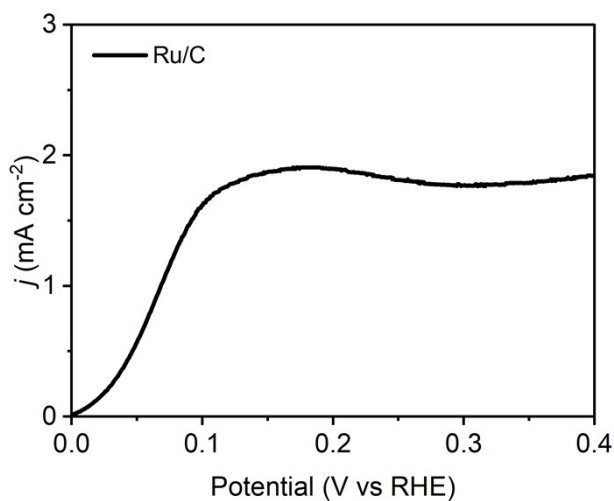

**Figure S13.** HOR polarization curves of the 20 wt% Ru/C recorded in H<sub>2</sub>-saturated 0.1 M KOH solution. the HOR current density increases up to 0.2 V and then decreases. It is worth noting that the oxidation of Ru-species would happen when the potential is positive than 0.2 V (*J. Am. Chem. Soc.* 2013, 135, 8016). Interestingly, this self-oxidation can not observed on Ru<sub>6</sub>/NCHS, suggesting the electrochemical superiority of our designed catalyst.

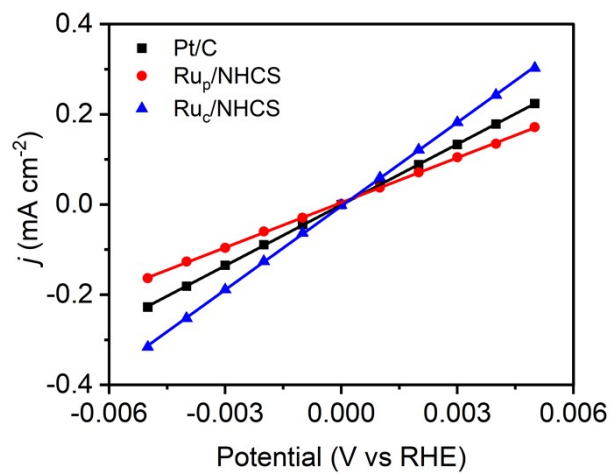

**Figure S14.** Micro-polarization region.

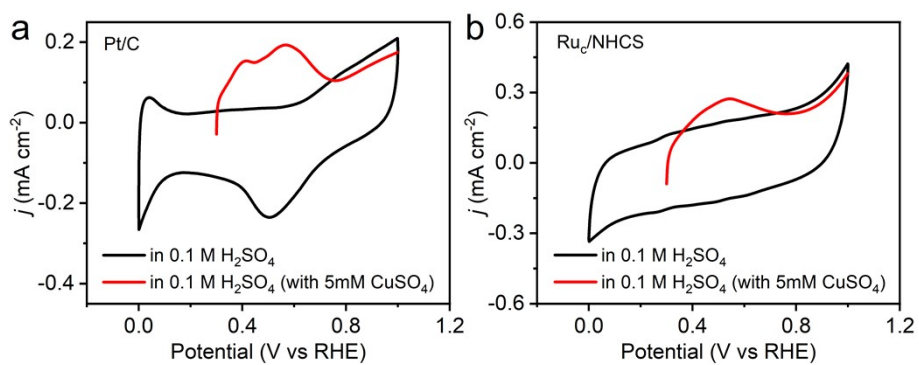

**Figure S15.** Cu-UPD measurements on Ru<sub>c</sub>/NHCS and Pt/C. The measured ECSA for Ru<sub>c</sub>/NHCS and Pt/C is 0.73 cm<sup>2</sup> μg<sub>Pt</sub><sup>-1</sup> and 3.62 cm<sup>2</sup> μg<sub>Ru</sub><sup>-1</sup>, respectively. It should be noted that the obtained ECSA on Pt/C is consistent with the literature (Zhao et al. ACS Catal. 2020, 10, 11751), indicative of the reliability of our measurements.

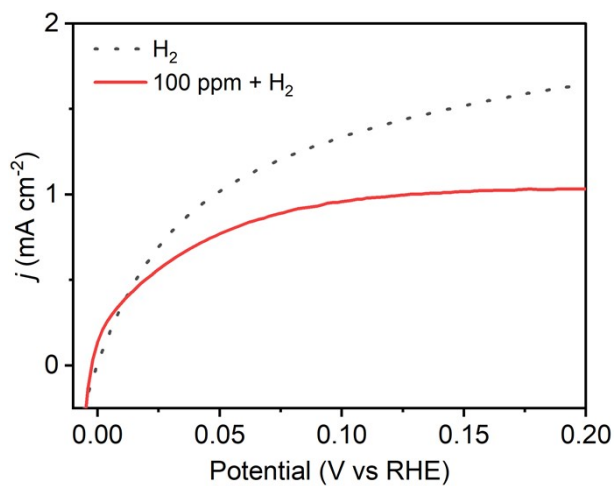

**Figure S16.** HOR polarization curves of Ru<sub>p</sub>/NCHS recorded in electrolytes with (solid line) and without (dashed line) the addition of 100 ppm CO. It can be found that Ru<sub>p</sub>/NCHS deliver a notable activity decay in H<sub>2</sub> with 100 ppm CO, implying its poor CO resistance.

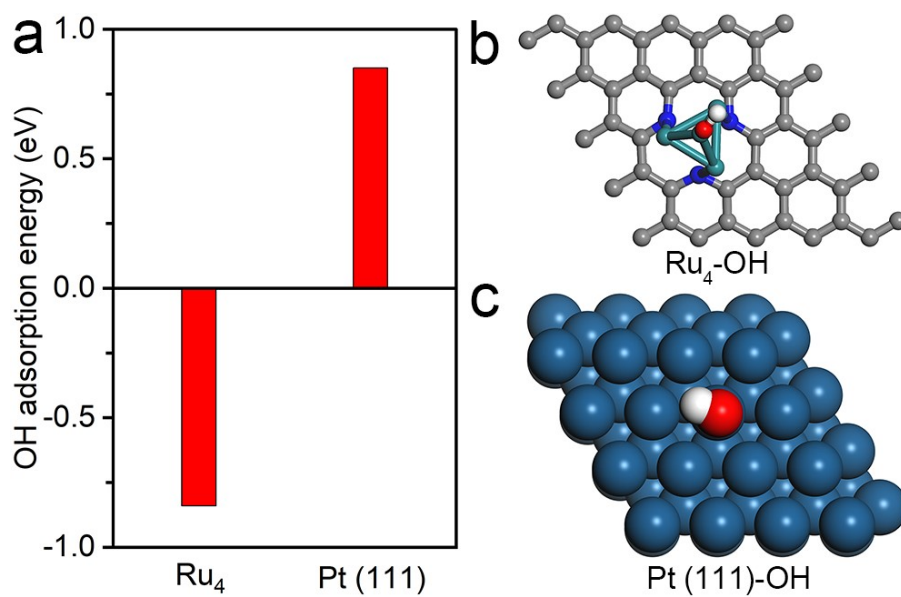

**Figure S17.** DFT calculated OH adsorption energies on Ru<sub>p</sub>/NCHS, Ru<sub>c</sub>/NCHS and Pt/C.

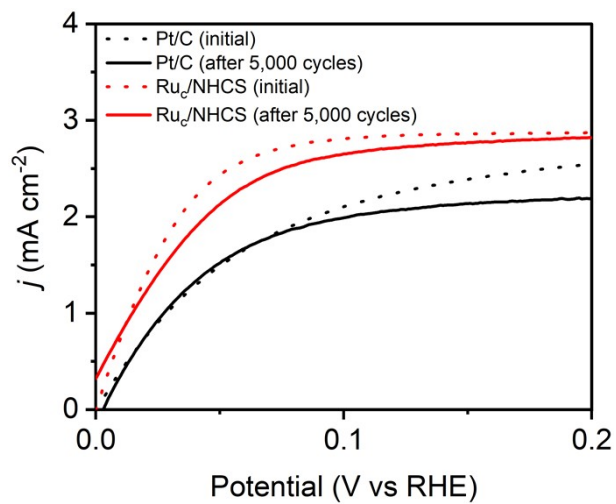

**Figure S18.** HOR polarization curves for Ru<sub>c</sub>/NHCS and Pt/C recorded after 5,000 cycles.

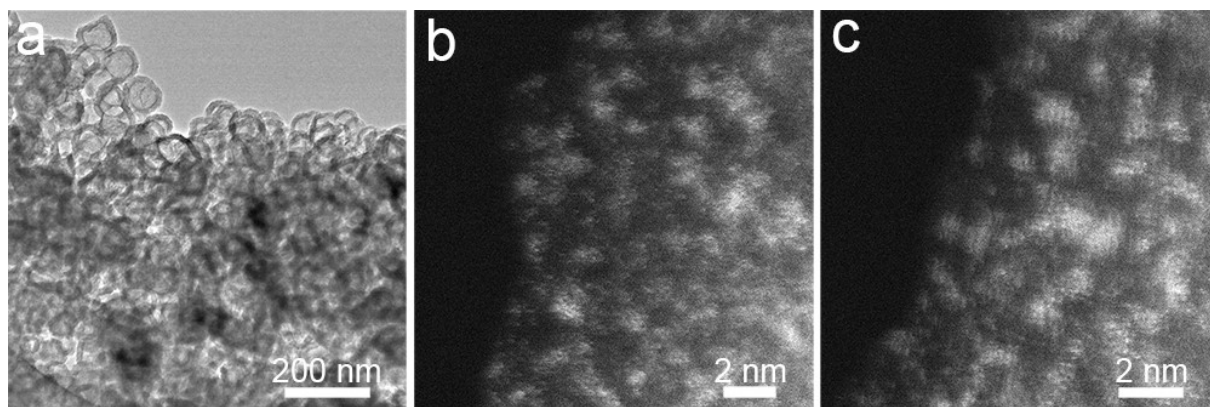

**Figure S19.** Additional TEM and HAADF-STEM images for Ru<sub>c</sub>/NCHS after the 15-h electrolysis.

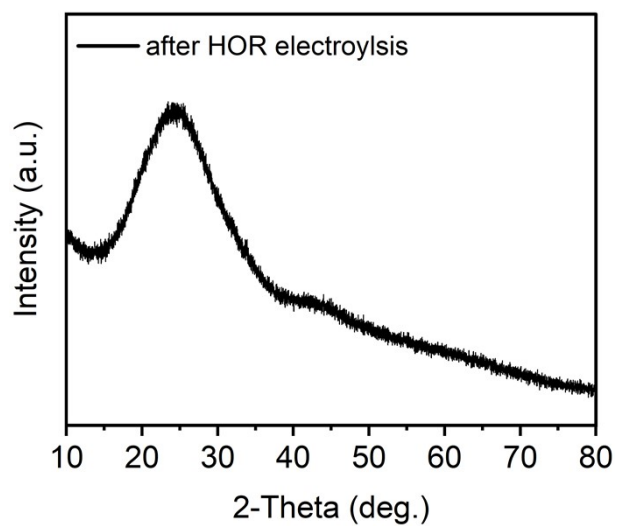

**Figure S20.** Additional XRD patterns of Ru<sub>6</sub>/NCHS after the 15-h electrolysis. Clearly, no additional peaks can be observed after the stability test.



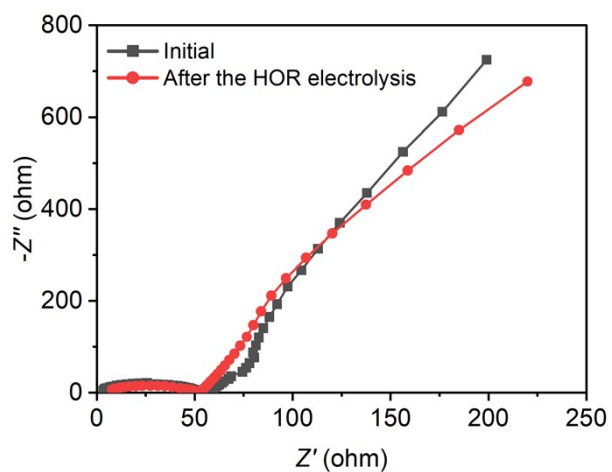

**Figure S21.** Additional impedance spectra of Ru<sub>c</sub>/NCHS after the 15-h electrolysis. Clearly, the obtained two spectra are close to each other, indicative of the good electrochemical stability of Ru<sub>c</sub>/NCHS.

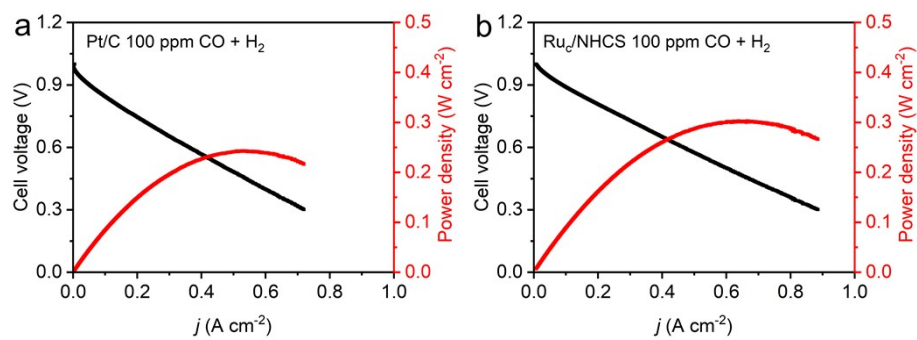

**Figure S22.** PEMFC cell performance of Ru<sub>x</sub>/NHCS and Pt/C in H<sub>2</sub>/100 ppm CO.
